# Supplementary material for: Systematic evaluation of supervised classifiers for fecal microbiota-based prediction of colorectal cancer
Source: PubMed Central journal article supplement (PMC5354752; doi:10.18632/oncotarget.14488), 2017-01-04
Supplement: oncotarget-08-9546-s001.pdf [file oncotarget-08-9546-s001.pdf]

# Systematic evaluation of supervised classifiers for fecal microbiota-based prediction of colorectal cancer

## Supplementary Materials

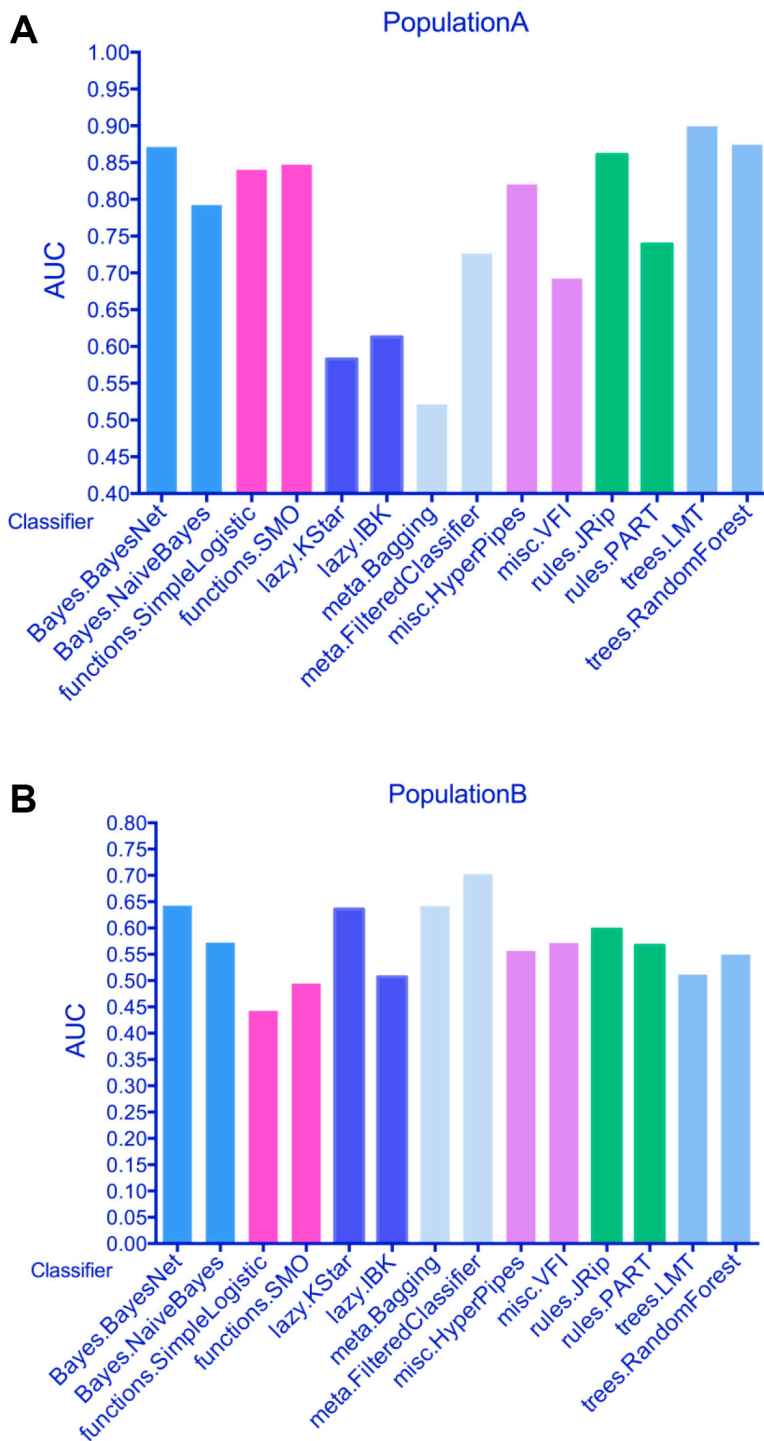

**Supplementary Figure S1: The CRA prediction accuracy based on fecal microbiome varied among different classifiers and populations.** (A) The test accuracy of different models using fecal microbiome on study population A was displayed using area under roc curve (AUC). (B) The test accuracy of different models using fecal microbiome on study population B was displayed using AUC.

**Supplementary Table S1: The performance of different algorithms in population A**

| Classifier                            | Weighted Avg | CRA   | CRC   | NC    |
|---------------------------------------|--------------|-------|-------|-------|
| Bayes.Bayes Net                       | 0.888        | 0.871 | 0.937 | 0.859 |
| Bayes.Naive Bayes                     | 0.847        | 0.792 | 0.908 | 0.839 |
| Bayes.Naive Bayes Multinomial Text    | 0.472        | 0.459 | 0.461 | 0.495 |
| Bayes.Naive Bayes Updateable          | 0.847        | 0.792 | 0.908 | 0.839 |
| functions.Logistic                    | 0.862        | 0.84  | 0.9   | 0.846 |
| functions.Simple Logistic             | 0.909        | 0.892 | 0.959 | 0.878 |
| functions.SMO                         | 0.87         | 0.847 | 0.923 | 0.841 |
| lazy.IBk                              | 0.663        | 0.613 | 0.772 | 0.608 |
| lazy.KStar                            | 0.581        | 0.583 | 0.639 | 0.524 |
| lazy.WL                               | 0.696        | 0.631 | 0.811 | 0.649 |
| meta.AdaBoostM1                       | 0.774        | 0.739 | 0.868 | 0.72  |
| meta.Attribute Selected Classifier    | 0.762        | 0.807 | 0.828 | 0.661 |
| meta.Bagging                          | 0.504        | 0.521 | 0.493 | 0.501 |
| meta.Classification Via Clustering    | 0.531        | 0.538 | 0.543 | 0.515 |
| meta.Classification Via Regression    | 0.472        | 0.459 | 0.461 | 0.495 |
| meta.CV Parameter Selection           | 0.472        | 0.459 | 0.461 | 0.495 |
| meta.Dagging                          | 0.855        | 0.848 | 0.931 | 0.79  |
| meta.Decorate                         | 0.855        | 0.87  | 0.899 | 0.855 |
| meta.END                              | 0.867        | 0.893 | 0.904 | 0.81  |
| meta.Filtered Classifier              | 0.709        | 0.726 | 0.753 | 0.653 |
| meta.Grading                          | 0.5          | 0.5   | 0.5   | 0.5   |
| meta.Iterative Classifier Optimizer   | 0.875        | 0.837 | 0.947 | 0.842 |
| meta.Logit Boost                      | 0.879        | 0.845 | 0.951 | 0.844 |
| meta.Multi BoostAB                    | 0.76         | 0.756 | 0.86  | 0.67  |
| meta.MultiClass Classifier            | 0.866        | 0.831 | 0.901 | 0.865 |
| meta.Multi Scheme                     | 0.472        | 0.459 | 0.461 | 0.495 |
| meta.Random Committee                 | 0.8          | 0.773 | 0.923 | 0.711 |
| meta.Randomizable Filtered Classifier | 0.615        | 0.59  | 0.628 | 0.626 |
| meta.Random SubSpace                  | 0.87         | 0.882 | 0.91  | 0.821 |
| meta.Stacking                         | 0.472        | 0.459 | 0.461 | 0.495 |
| meta.Vote                             | 0.472        | 0.459 | 0.461 | 0.495 |
| misc.HyperPipes                       | 0.85         | 0.82  | 0.919 | 0.814 |
| misc.VFI                              | 0.719        | 0.692 | 0.798 | 0.67  |
| misc.Input Mapped Classifier          | 0.472        | 0.459 | 0.461 | 0.495 |
| rules.Conjunctive Rule                | 0.495        | 0.495 | 0.491 | 0.5   |
| rules.Decision Table                  | 0.791        | 0.77  | 0.799 | 0.803 |
| rules.JRip                            | 0.803        | 0.861 | 0.804 | 0.749 |
| rules.OneR                            | 0.5          | 0.5   | 0.5   | 0.5   |
| rules.NNge                            | 0.737        | 0.723 | 0.833 | 0.661 |
| rules.PART                            | 0.723        | 0.739 | 0.773 | 0.664 |
| rules.ZeroR                           | 0.472        | 0.459 | 0.461 | 0.495 |
| trees.BFTree                          | 0.472        | 0.459 | 0.461 | 0.495 |
| trees.DecisionStump                   | 0.655        | 0.581 | 0.757 | 0.626 |
| trees.FT                              | 0.905        | 0.887 | 0.946 | 0.884 |
| trees.Hoeffding Tree                  | 0.705        | 0.604 | 0.829 | 0.68  |
| trees.J48                             | 0.722        | 0.768 | 0.765 | 0.642 |
| trees.J48 graft                       | 0.73         | 0.702 | 0.788 | 0.702 |
| trees.LAD Tree                        | 0.861        | 0.86  | 0.935 | 0.794 |
| trees.LMT                             | 0.905        | 0.899 | 0.948 | 0.87  |
| trees.Random Forest                   | 0.887        | 0.874 | 0.945 | 0.846 |
| trees.RandomTree                      | 0.613        | 0.567 | 0.7   | 0.574 |
| trees.REP Tree                        | 0.472        | 0.459 | 0.461 | 0.495 |
| trees.Simple Cart                     | 0.472        | 0.459 | 0.461 | 0.495 |

**Supplementary Table S2: The performance of different algorithms in population B**

| Classifier                             | Weighted Avg | CRA   | CRC   | NC    |
|----------------------------------------|--------------|-------|-------|-------|
| Bayes.Bayes Net                        | 0.723        | 0.642 | 0.807 | 0.685 |
| Bayes.Naive Bayes                      | 0.685        | 0.572 | 0.77  | 0.662 |
| Bayes.Naive Bayes Multinomial Text     | 0.472        | 0.45  | 0.471 | 0.481 |
| Bayes.Naive Bayes Updateable           | 0.685        | 0.572 | 0.77  | 0.662 |
| functions.Logistic                     | 0.562        | 0.457 | 0.557 | 0.612 |
| functions.Multilayer Perceptron        | 0.698        | 0.553 | 0.7   | 0.7   |
| functions.Simple Logistic              | 0.612        | 0.442 | 0.734 | 0.582 |
| functions.SMO                          | 0.617        | 0.494 | 0.727 | 0.576 |
| lazy.IBk                               | 0.576        | 0.507 | 0.591 | 0.593 |
| lazy.KStar                             | 0.648        | 0.535 | 0.679 | 0.671 |
| lazy.LWL                               | 0.648        | 0.535 | 0.679 | 0.671 |
| meta.AdaBoostM1                        | 0.615        | 0.444 | 0.702 | 0.615 |
| meta.Attribute Selected Classifier     | 0.725        | 0.672 | 0.803 | 0.682 |
| meta.Bagging                           | 0.737        | 0.641 | 0.834 | 0.696 |
| meta.Classification Via Clustering     | 0.504        | 0.5   | 0.49  | 0.518 |
| meta.Classification Via Regression     | 0.688        | 0.618 | 0.796 | 0.624 |
| meta.CV Parameter Selection            | 0.472        | 0.45  | 0.471 | 0.481 |
| meta.Dagging                           | 0.732        | 0.605 | 0.778 | 0.749 |
| meta.Decorate                          | 0.716        | 0.574 | 0.825 | 0.685 |
| meta.END                               | 0.686        | 0.492 | 0.787 | 0.684 |
| meta.Filtered Classifier               | 0.656        | 0.702 | 0.616 | 0.798 |
| meta.Grading                           | 0.5          | 0.5   | 0.5   | 0.5   |
| meta.Iterative Classifier Optimizer    | 0.587        | 0.425 | 0.716 | 0.546 |
| meta.Logit Boost                       | 0.639        | 0.476 | 0.735 | 0.628 |
| meta.MultiBoostAB                      | 0.647        | 0.471 | 0.726 | 0.658 |
| meta.Multi Class Classifier            | 0.582        | 0.493 | 0.607 | 0.599 |
| meta.Multi Class Classifier Updateable | 0.638        | 0.503 | 0.716 | 0.631 |
| meta.Multi Scheme                      | 0.472        | 0.45  | 0.471 | 0.481 |
| meta.Random Committee                  | 0.694        | 0.519 | 0.813 | 0.668 |
| meta.Randomizable Filtered Classifier  | 0.514        | 0.427 | 0.544 | 0.526 |
| meta.Random SubSpace                   | 0.709        | 0.604 | 0.81  | 0.667 |
| meta.Stacking                          | 0.472        | 0.45  | 0.471 | 0.481 |
| meta.Vote                              | 0.472        | 0.45  | 0.471 | 0.481 |
| misc.HyperPipes                        | 0.699        | 0.556 | 0.841 | 0.64  |
| misc.Input Mapped Classifier           | 0.472        | 0.45  | 0.471 | 0.481 |
| misc.VFI                               | 0.641        | 0.571 | 0.71  | 0.611 |
| rules.Conjunctive Rule                 | 0.489        | 0.468 | 0.486 | 0.5   |
| rules.Decision Table                   | 0.632        | 0.558 | 0.703 | 0.603 |
| rules.JRip                             | 0.703        | 0.598 | 0.77  | 0.691 |
| rules.NNge                             | 0.665        | 0.547 | 0.726 | 0.663 |
| rules.OneR                             | 0.524        | 0.553 | 0.495 | 0.535 |
| rules.PART                             | 0.673        | 0.567 | 0.762 | 0.641 |
| rules.Ridor                            | 0.5          | 0.5   | 0.5   | 0.5   |
| rules.ZeroR                            | 0.472        | 0.45  | 0.471 | 0.481 |
| trees.BFTree                           | 0.58         | 0.536 | 0.616 | 0.568 |
| trees.Decision Stump                   | 0.558        | 0.526 | 0.591 | 0.543 |
| trees.FT                               | 0.647        | 0.583 | 0.724 | 0.609 |
| trees.HoeffdingTree                    | 0.67         | 0.596 | 0.759 | 0.626 |
| trees.J48                              | 0.657        | 0.573 | 0.752 | 0.612 |
| trees.J48graft                         | 0.525        | 0.512 | 0.59  | 0.475 |
| trees.LAD Tree                         | 0.629        | 0.654 | 0.642 | 0.608 |
| trees.LMT                              | 0.65         | 0.511 | 0.746 | 0.629 |
| trees.Random Forest                    | 0.736        | 0.549 | 0.846 | 0.724 |
| trees.Random Tree                      | 0.546        | 0.471 | 0.554 | 0.572 |
| trees.REPTree                          | 0.595        | 0.555 | 0.639 | 0.576 |
